# Supplementary material for: Robust imidazole-linked Ni-phthalocyanine-based covalent-organic framework for CO2 electroreduction in the full pH range
Source: Royal Society of Chemistry journal article supplement (doi:10.1039/d3qm01190a), 2024-01-01
Supplement: d3qm01190a1.pdf [file d3qm01190a1.pdf]

# Supporting Information

## **Robust imidazole-linked Ni-phthalocyanine-based covalent-organic framework for CO<sub>2</sub> electroreduction in full pH range**

Xu Yang,<sup>a,c</sup> Duan-Hui Si,<sup>a\*</sup> Hong-Fang Li,<sup>a</sup> Rong Cao<sup>a,b,d\*</sup> and Yuan-Biao Huang<sup>a,b,d\*</sup>

[a] Prof. D.-H. Si, Prof. Y.-B. Huang, Prof. R. Cao, X. Yang, Prof. H.-F. Li

State Key Laboratory of Structural Chemistry

Fujian Institute of Research on the Structure of Matter, Chinese Academy of Sciences

Fuzhou 350002, China

[b] Prof. Y.-B. Huang, Prof. R. Cao

Fujian Science & Technology Innovation Laboratory for Optoelectronic Information of  
China

Fuzhou, Fujian, 350108, P. R. China

Fuzhou 350108, China

[c] X. Yang

Fujian Cross Strait Institute of Flexible Electronics (Future Technology), Fujian  
Normal University

Fuzhou, 350117, China

[d] Prof. Y.-B. Huang, Prof. R. Cao

University of Chinese Academy of Sciences

Beijing 100049, China

E-mail: ybhuang@fjirsm.ac.cn; rcao@fjirsm.ac.cn

# 1. Materials and Synthetic Procedures:

## 1.1. Materials

All solvents, reagents and chemicals were purchased from commercial suppliers, such as Sigma-Aldrich, TCI and J&K and used without further purification unless specially addressed. All aqueous solutions were prepared with Ultrapure water (18.25 M $\Omega$ ·cm).

## 1.2. Monomer synthesis

NiPc-(NH<sub>2</sub>)<sub>8</sub> was synthesized following a literature procedure.<sup>1</sup>

## 1.3. The synthesis of NiPc-Im-COF

NiPc-Im-COF was prepared as follows. A Pyrex tube measuring 10×8 mm (o.d × i.d) was charged with NiPc-(NH<sub>2</sub>)<sub>8</sub> (13.80 mg, 0.02 mmol), BPDH (5.4 mg, 0.04 mmol), NMP/mesitylene (1.2 mL/0.3 mL). After sonication for 30 minutes, the tube was flash frozen at 77 K (liquid N<sub>2</sub> bath). After one freeze-pump-thaw cycle the tube was flame sealed under vacuum. Upon sealed, the length of the tube was reduced to approximately 12 cm. The reaction was heated at 170 °C for six days. After cooling to room temperature, the dark green solid was collected by centrifugation and washed with *N,N'*-dimethylformamide and dichloromethane. Finally, the product was evacuated at 70 °C overnight to give NiPc-Im-COF as dark green powder.

## 2. Methods

### 2.1. Characterization

Powder X-ray diffraction (PXRD) patterns were recorded on a Miniflex-600 diffractometer using Cu K $\alpha$  radiation ( $\lambda = 0.154$  nm). Fourier transform infrared (FT-IR) spectroscopy was performed using KBr pellets on a Bruker VERTEX70 spectrometer in the 400-4000 cm<sup>-1</sup>. Solid-state <sup>13</sup>C NMR spectra of COF was recorded on Bruker-Biospin AVANCE III HD spectrometer. X-ray photoelectron spectroscopy

(XPS) measurements were performed on an ESCALAB 250Xi X-ray photoelectron spectrometer (Thermo Fisher) using an Al K $\alpha$  source (15 kV, 10 mA). (the C-C peak here were corrected to 284.8 eV). Elemental analyses (EA) of C, H, and N were carried out on an Elementar Vario EL-Cube analyzer. Thermogravimetric analysis (TGA) were performed under a nitrogen atmosphere with a heating rate of 5 °C min<sup>-1</sup> by using an SDT Q600 thermogravimetric analyser. The content of Ni in the solid samples was detected by inductively coupled plasma atomic emission spectroscopy (ICP-AES) on an Ultima2 analyzer (Jobin Yvon). Scanning electron microscopy (SEM) images were obtained by field emission scanning electron microscopy (JSM6700-F). Transmission electron microscope (TEM) images were recorded by a ThermoFisher Scientific TALOS F200X G2 working at 200 kV. N<sub>2</sub> adsorption-desorption isotherm and the Brunauer-Emmett-Teller (BET) surface area measurements were measured by using Micromeritics ASAP 2460 instrument. CO<sub>2</sub> sorption isotherm was measured by using Micromeritics ASAP 2020 instrument. The gas chromatography measurements were performed on the Agilent 7820A gas chromatograph (GC) equipped with FID and TCD.

## **2.2. Activation of Im-COF before BET measurement**

The isolated powders was transferred to a Soxhlet extractor and thoroughly washed with DCM (24 h) and THF (24 h). Following that, the product was thoroughly washed with liquid CO<sub>2</sub>. The system was then heated up to 45 °C to bring about the supercritical state of CO<sub>2</sub> and slowly bled to ambient pressure. Finally the product of NiPc-Im-COF was degassed at room temperature for 10 h at 10<sup>-2</sup> mTorr to yield activated sample.

## 2.3. Electrochemical measurements

### 2.3.1 CO<sub>2</sub>RR test in H-cell

Electrochemical experiments were implemented in a designed H-type electrochemical cell with two compartments separated by anion-exchange membrane (Nafion-117). Each compartment contained 70 mL electrolyte (0.5 M KHCO<sub>3</sub> made from ultrapure water). The working electrode was fabricated by coating 60  $\mu$ L catalyst ink into carbon fiber paper electrode with 1 cm  $\times$  1 cm. The homogeneous ink was prepared using 5 mg of catalyst and 2 mg ketjenblack dispersed into 1 mL of isopropanol containing 50  $\mu$ L Nafion solution (5 wt%). Electrochemical measurements were performed in a three-electrode cell using the Ag/AgCl electrode as the reference electrode and Pt gauze as the counter electrode. Before the CO<sub>2</sub> electrochemical reduction, the electrolyte in the cathodic compartment was purged with CO<sub>2</sub> gas for at least 30 min to achieve the CO<sub>2</sub>-saturated solution (pH = 7.3). Cyclic voltammetry (CV) experiments were conducted at room temperature at 100 mV s<sup>-1</sup>. Linear sweep voltammetry (LSV) was performed with a scan rate of 10 mV s<sup>-1</sup> from -0.62 to -1.82 V vs. Ag/AgCl in CO<sub>2</sub>-saturated 0.5 M KHCO<sub>3</sub> electrolyte. In the studies, all potentials were converted to potential vs. reversible hydrogen electrode (RHE) according to the equation  $E (\text{vs. RHE}) = E (\text{vs. Ag/AgCl}) + 0.1989 \text{ V} + 0.059 \times \text{pH}$ . CO<sub>2</sub> gas was delivered at an average rate of 30 mL·min<sup>-1</sup> (at room temperature and ambient pressure) and routed into the gas sampling loop (0.8 mL) of a gas chromatograph. The gas phase composition was analyzed by GC every 15 min. The separated gas products were analyzed by a thermal conductivity detector (for H<sub>2</sub>) and a flame ionization detector (for CO).

### 2.3.2 CO<sub>2</sub>RR test in Flow cell

Electrochemical measurements with high current densities were performed in a flow cell consists of a gas diffusion electrode (GDE), an anion exchange membrane and a carbon paper gas diffusion layer (GDL) anode. 100  $\mu$ L catalyst ink was loaded onto a 0.8 cm<sup>2</sup> GDL to create a GDE. The homogeneous ink was prepared using 5 mg of catalyst and 2 mg ketjenblack dispersed into 1 mL of isopropanol containing 50  $\mu$ L Nafion solution (5 wt%). An Ag/AgCl was acted as the reference. 1 M, 3 M and 5 M KOH aqueous solution was used as electrolyte and was circulated through the anode side using a peristaltic pump. CO<sub>2</sub> gas was supplied to the cathode side with a constant flow rate of 20 (scm) ml min<sup>-1</sup> monitored by a flow controller. Linear sweep voltammetry (LSV) was performed with a scan rate of 10 mV s<sup>-1</sup> from -0.6 to -1.8 V vs. Ag/AgCl. In the studies, all potentials were converted to potential vs. reversible hydrogen electrode (RHE) according to the equation  $E$  (vs. RHE) =  $E$  (vs. Ag/AgCl) + 0.1989 V + 0.059  $\times$  pH. During electrolysis procedure, the effluent gas from the cathode compartment went through the sampling loop (0.8 mL) of a gas chromatograph. The gas phase composition was analyzed by GC every 15 min. The separated gas products were analyzed by a thermal conductivity detector (for H<sub>2</sub>) and a flame ionization detector (for CO).

#### *Faradaic efficiency:*

The Faradaic efficiency (FE) for CO production at each applied potential was calculated based on the following equations:

$$FE = \frac{J_{CO}}{J_{total}} = \frac{v_{CO} \times N \times F}{J_{total}}$$

FE: Faradaic efficiency for CO production;

$J_{CO}$ : partial current density for CO production;

$J_{total}$ : total current density;

$v_{CO}$ : the production rate of CO (measured by GC);

N: the number of electron transferred for product formation, in which it is 2 for CO;

F: Faradaic constant, 96485 C mol<sup>-1</sup>.

*Turnover Frequency (TOF, h<sup>-1</sup>):*

The TOF for CO was calculated based on the following equations:

$$TOF = \frac{I_{product} / NF}{m_{cat} \times \omega / M_{metal}} \times 3600$$

$I_{product}$ : partial current for certain product, CO;

N: the number of electron transferred for product formation, in which it is 2 for CO;

F: Faradaic constant, 96485 C mol<sup>-1</sup>;

$m_{cat}$ : catalyst mass in the electrode, g;

$\omega$ : metal loading in the catalyst;

$M_{metal}$ : atomic mass of metal, g mol<sup>-1</sup>.

## 2.4 Computational methods

All calculations on NiPc-Im-COF in this study were performed with Vienna Ab initio Simulation Package (VASP)<sup>2-5</sup>, which were considered with Perdew-Burke-Ernzerh (PBE) flavor<sup>6</sup> of density functional theory (DFT) and the Projector Augmented Wave

(PAW)method.<sup>7, 8</sup> The cutoff energy of plane wave basis and the convergence criteria were set to 450 eV and  $1 \times 10^{-5}$  eV respectively. A k-point sampling of (2,2,1) was used. The clusters are separated from their periodic images in all directions by a vacuum space of 20 Å.

### 3. Figures and Tables

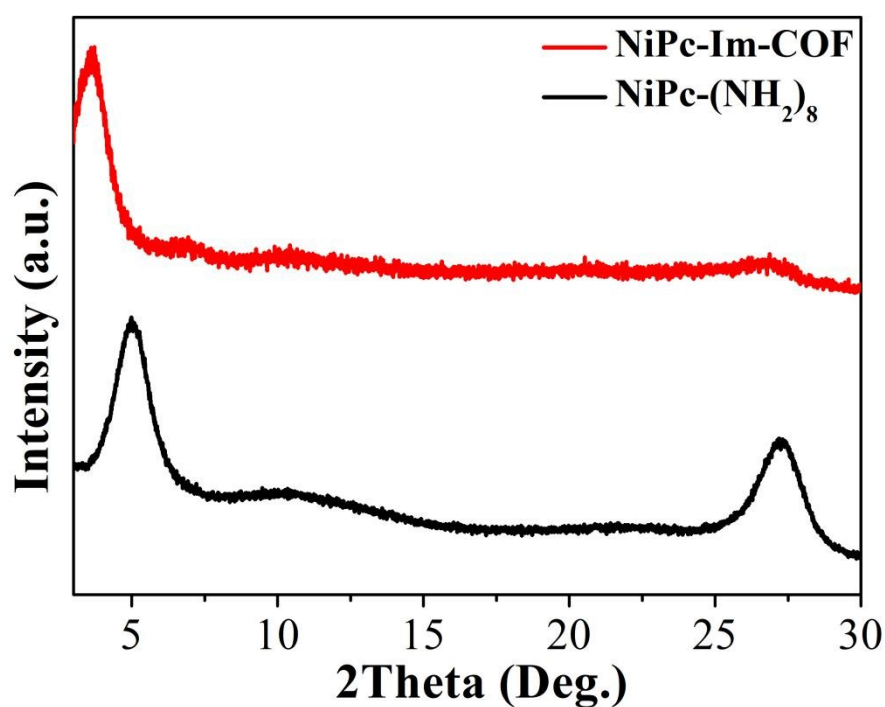

**Figure S1.** PXRD of NiPc-(NH<sub>2</sub>)<sub>8</sub> and NiPc-Im-COF. The main peaks of NiPc-(NH<sub>2</sub>)<sub>8</sub> were located at 5.02° and 27.3°, which were different from that of NiPc-Im-COF.

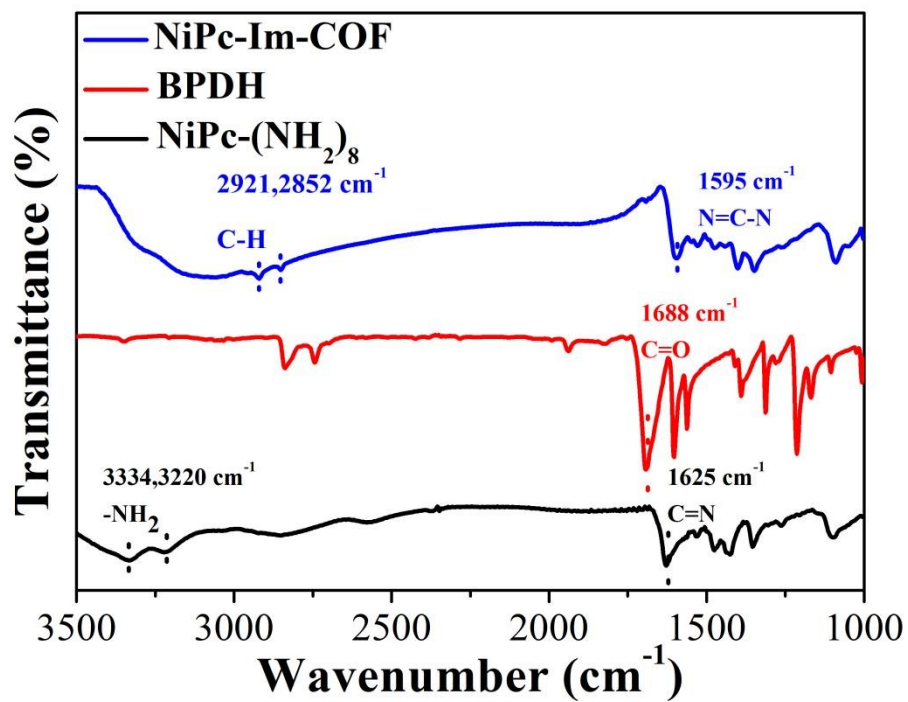

Figure S2. IR of NiPc-(NH<sub>2</sub>)<sub>8</sub>, BPDH and NiPc-Im-COF.



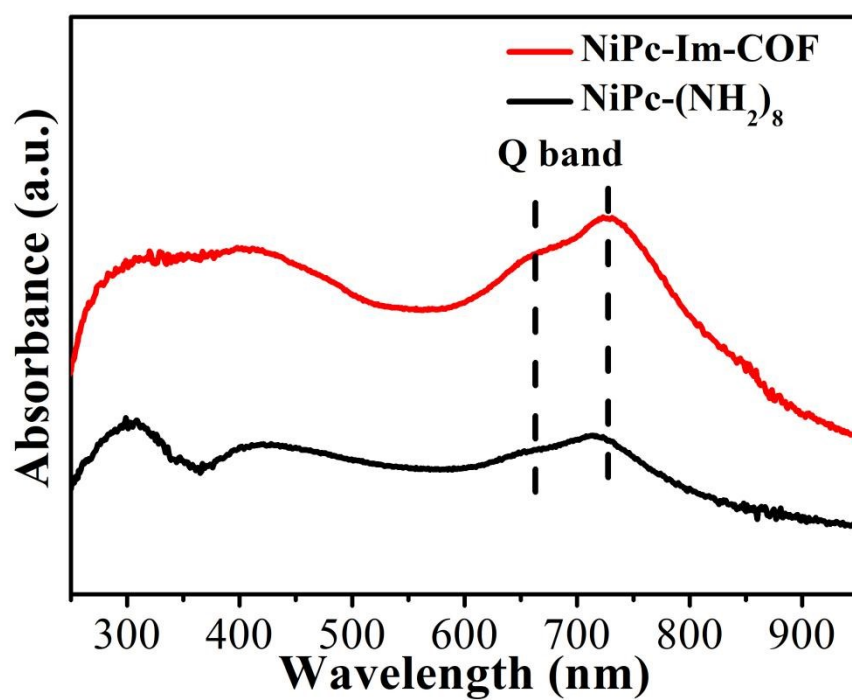

Figure S3. UV-Vis spectra of NiPc-Im-COF and NiPc-(NH<sub>2</sub>)<sub>8</sub>.

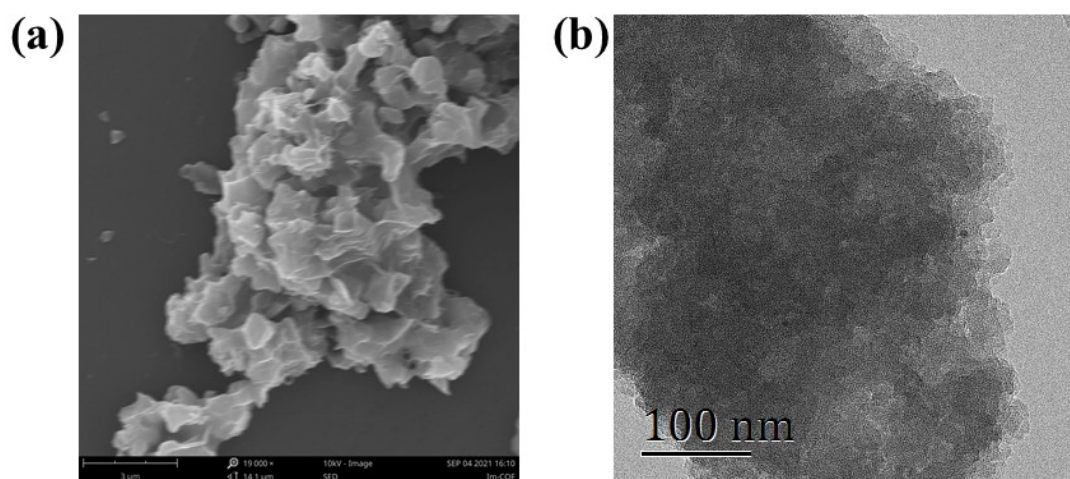

Figure S4. (a) SEM and (b) TEM of NiPc-Im-COF.

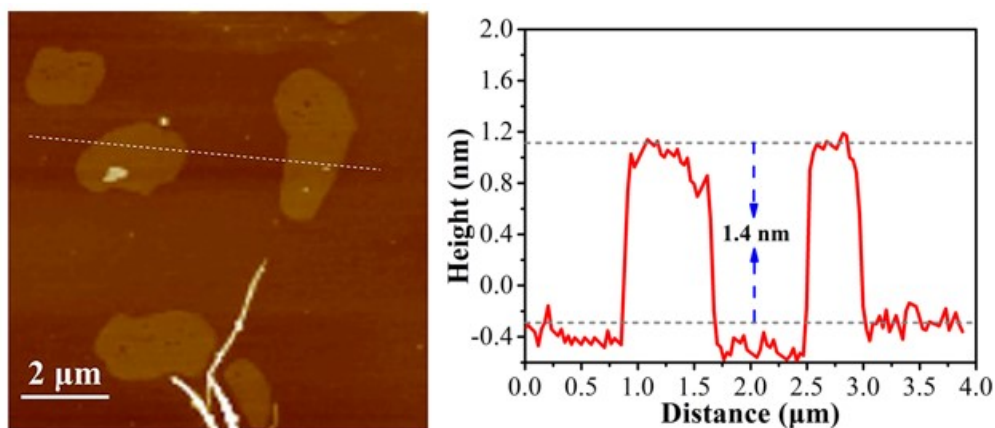

**Figure S5.** (a) AFM image and (b) height of NiPc-Im-COF.

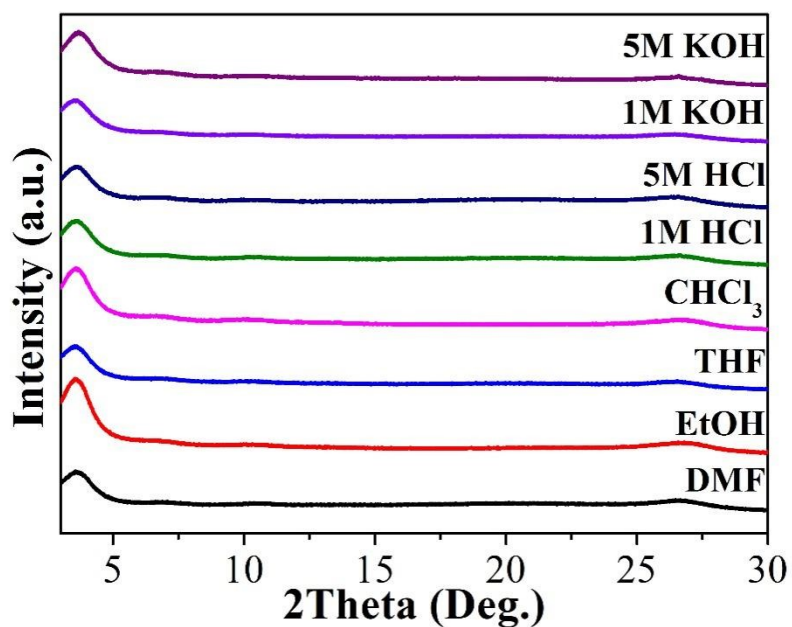

**Figure S6.** The chemical stability of NiPc-Im-COF tested in DMF, EtOH, THF, CHCl<sub>3</sub>, 1 and 5 M HCl and 1 and 5 M KOH at room temperature.

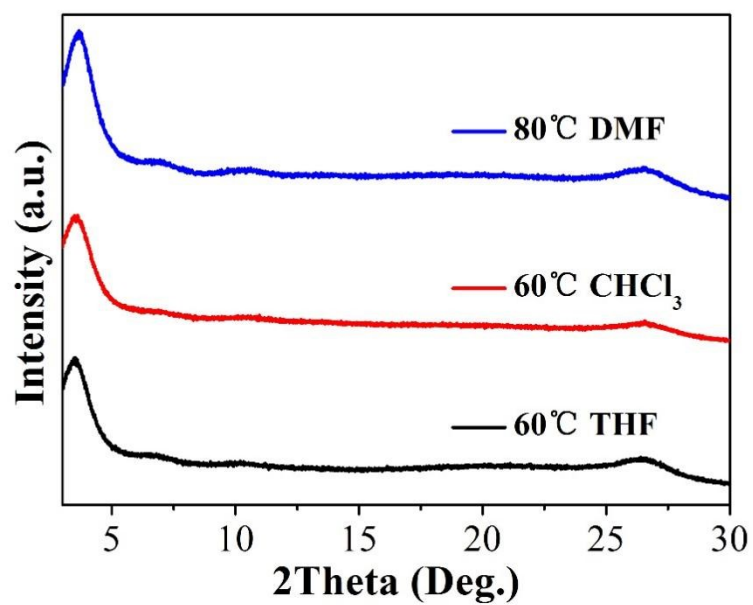

**Figure S7.** The chemical stability of NiPc-Im-COF tested in DMF, THF and CHCl<sub>3</sub> at 80 °C and 60 °C.

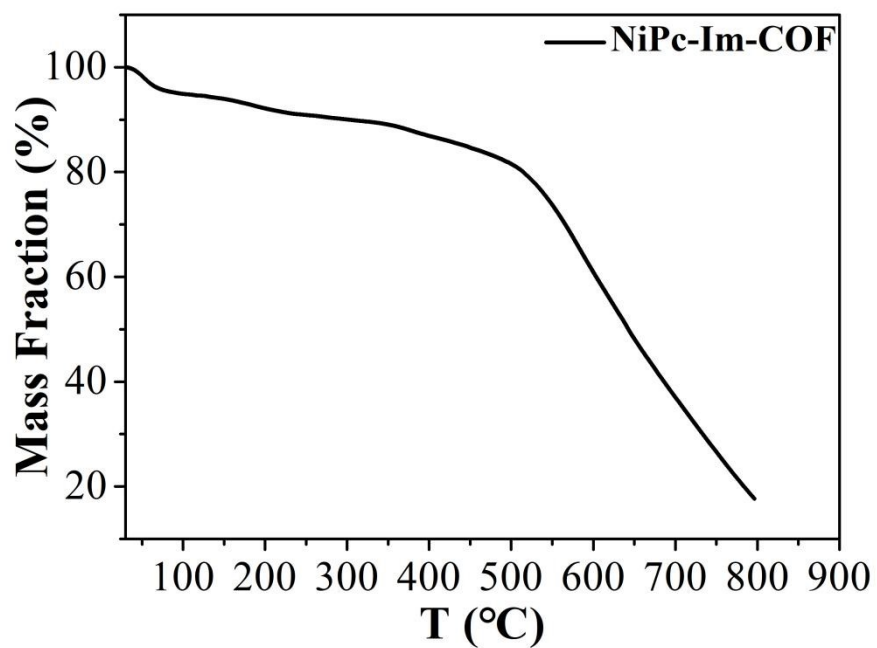

**Figure S8.** TGA curve of NiPc-Im-COF.

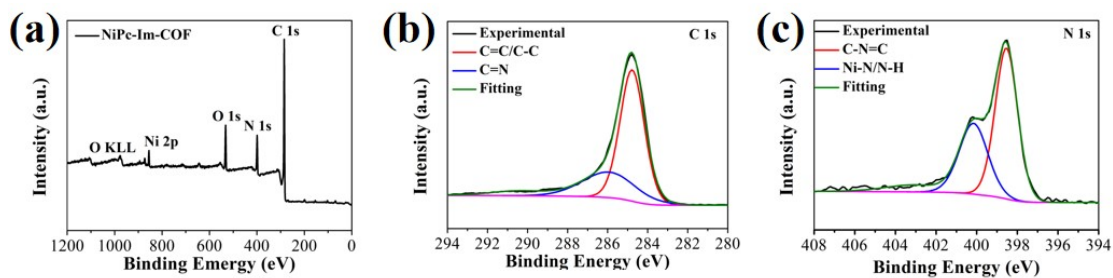

Figure S9. (a) Survey, (b) C 1s and (c) N 1s XPS spectra of NiPc-Im-COF.

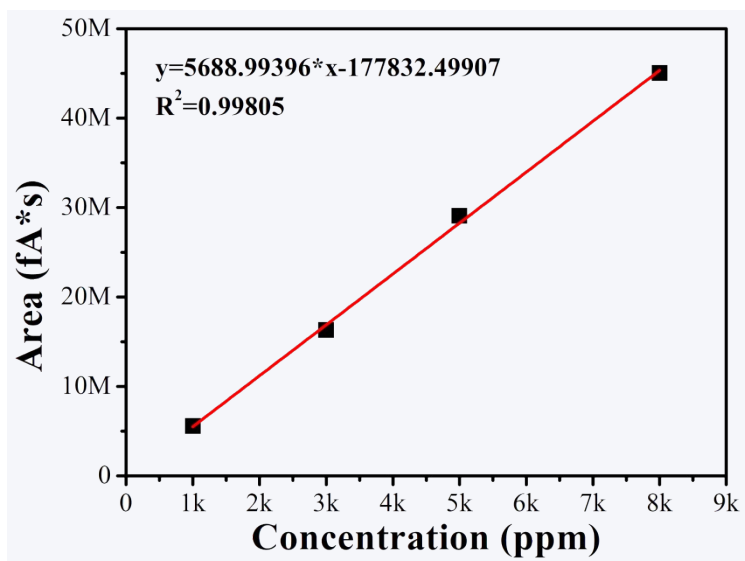

Figure S10. The calibration curve of CO.

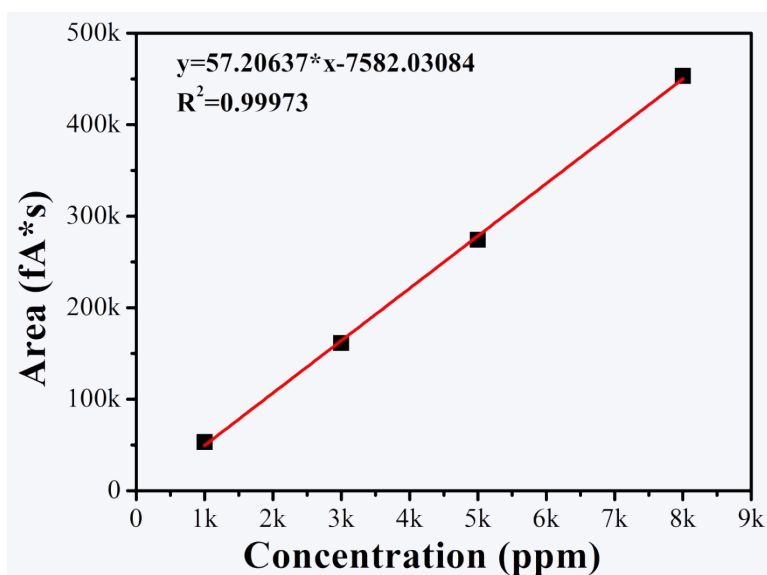

Figure S11. The calibration curve of H<sub>2</sub>.

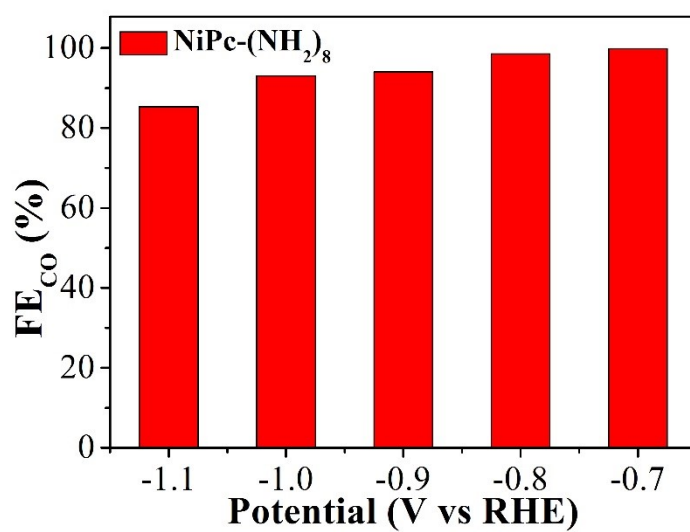

Figure S12. FECO in 0.5 M KHCO<sub>3</sub> of NiPc-(NH<sub>2</sub>)<sub>8</sub>.

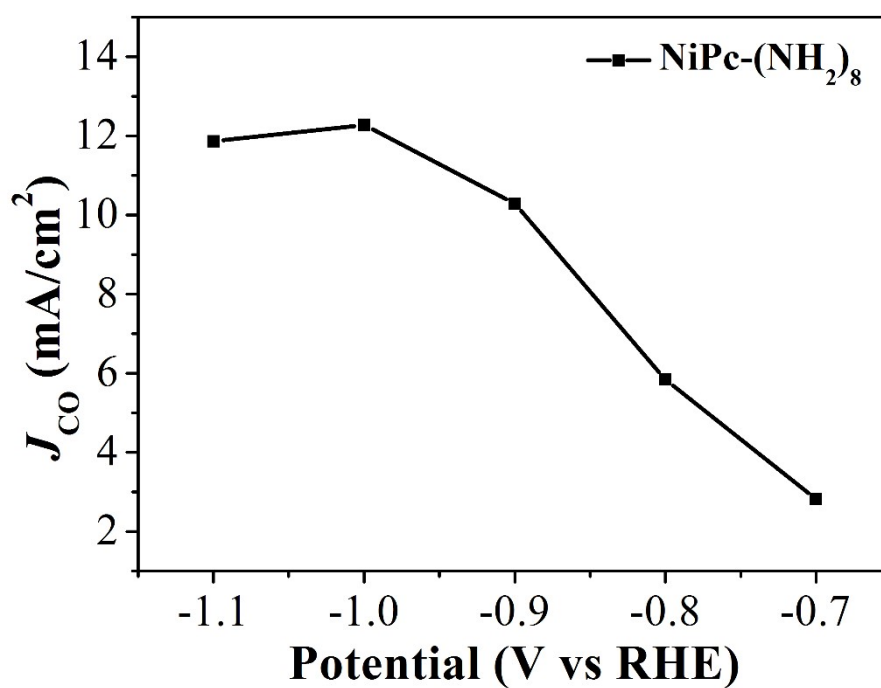

Figure S13. CO partial current density in 0.5 M KHCO<sub>3</sub> of NiPc-(NH<sub>2</sub>)<sub>8</sub>.

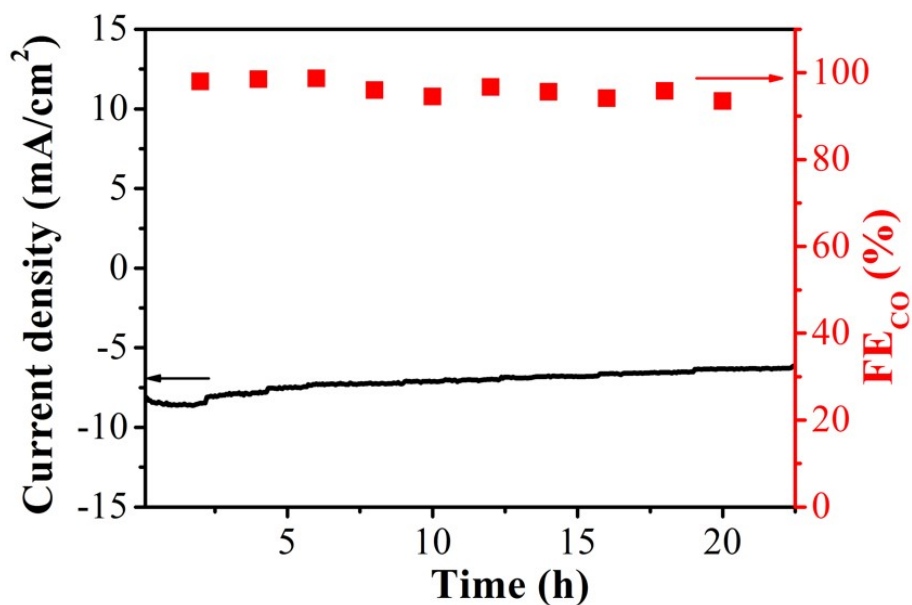

**Figure S14.** Long time stability test of NiPc-Im-COF at -0.8 V vs RHE in H-cell with 0.5 M KHCO<sub>3</sub> as electrolyte.

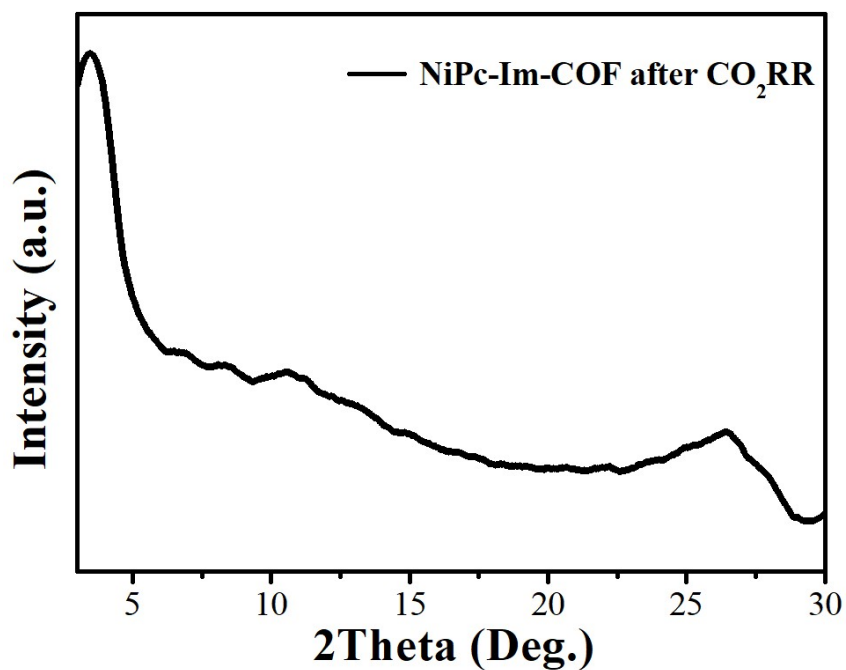

**Figure S15.** PXRD pattern of NiPc-Im-COF after electrocatalytic CO<sub>2</sub>RR in 0.5 M KHCO<sub>3</sub>.

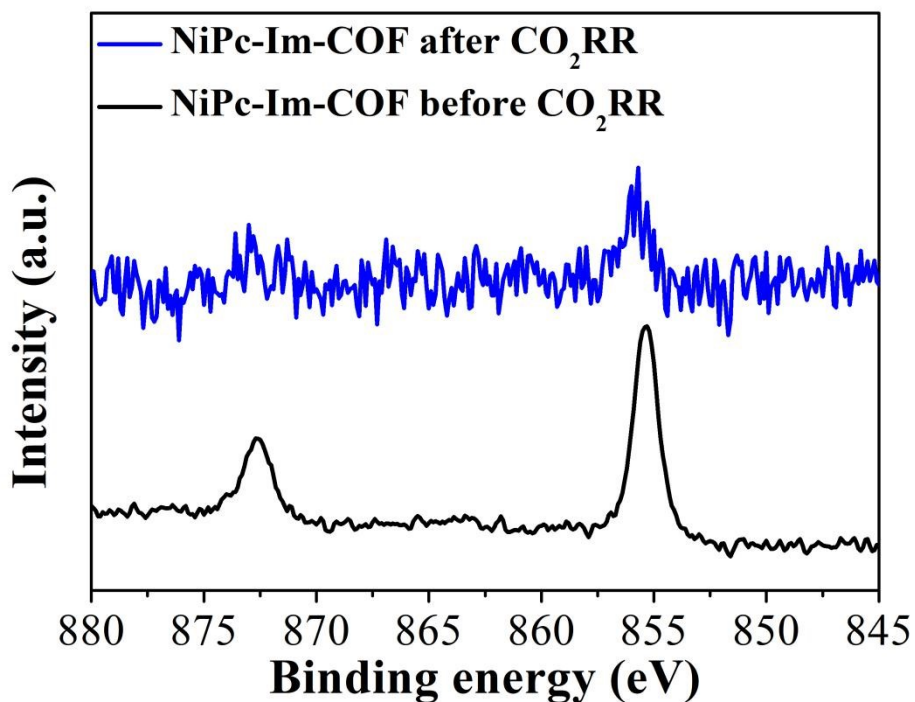

**Figure S16.** High-resolution Ni 2p XPS spectrum of NiPc-Im-COF before and after CO<sub>2</sub>RR testing in H-cell with 0.5 M KHCO<sub>3</sub> as electrolyte.

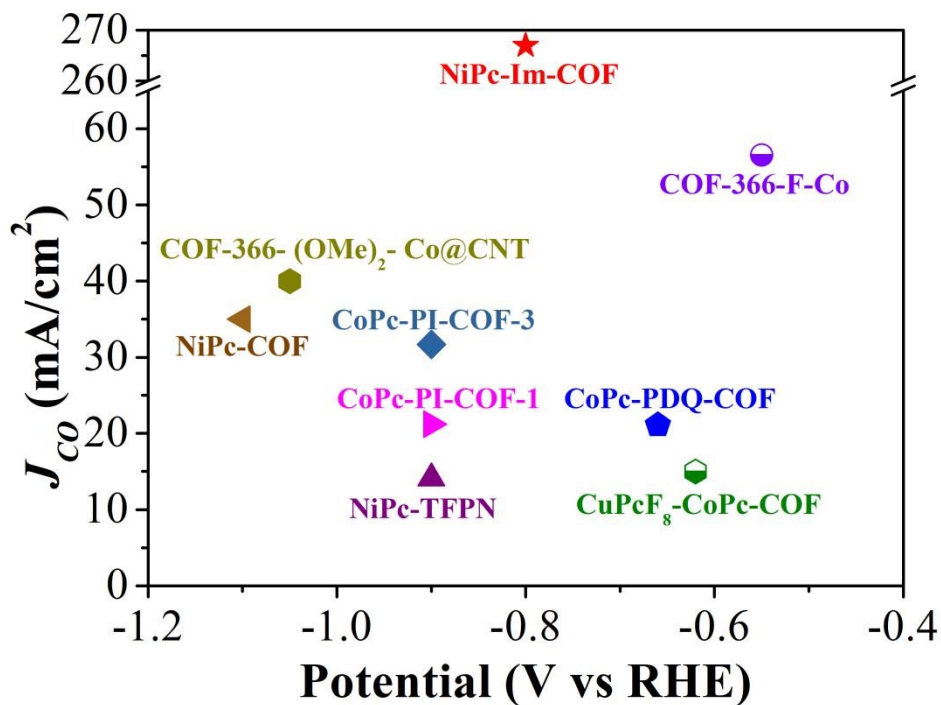

**Figure S17.** The comparison of  $J_{CO}$ .

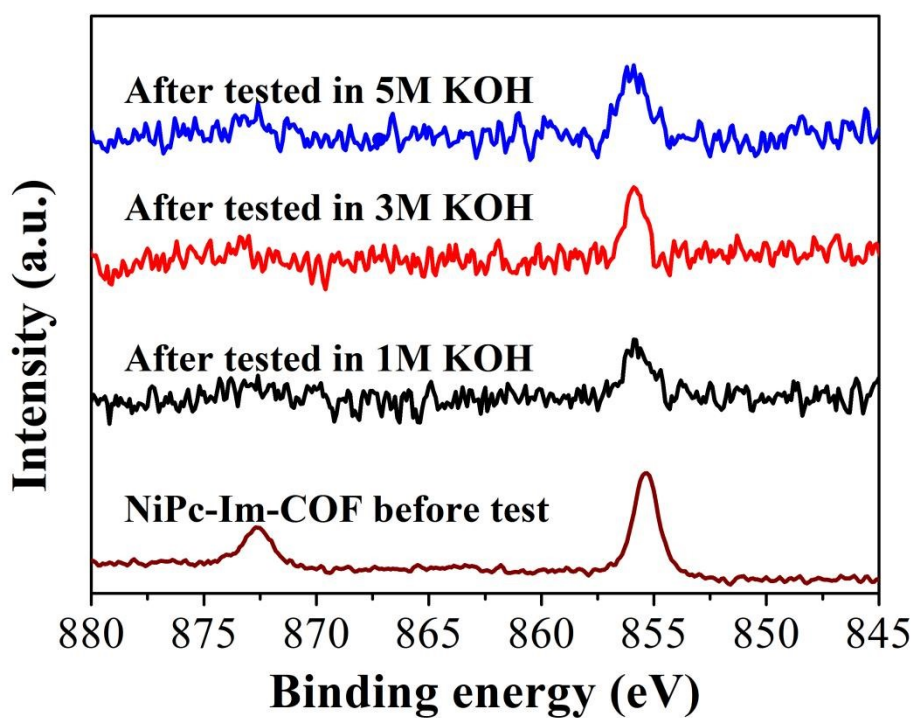

**Figure S18.** High-resolution Ni 2p XPS spectrum of NiPc-Im-COF before and after CO<sub>2</sub>RR testing in GDE with 1 M, 3 M and 5 M KOH as electrolyte.

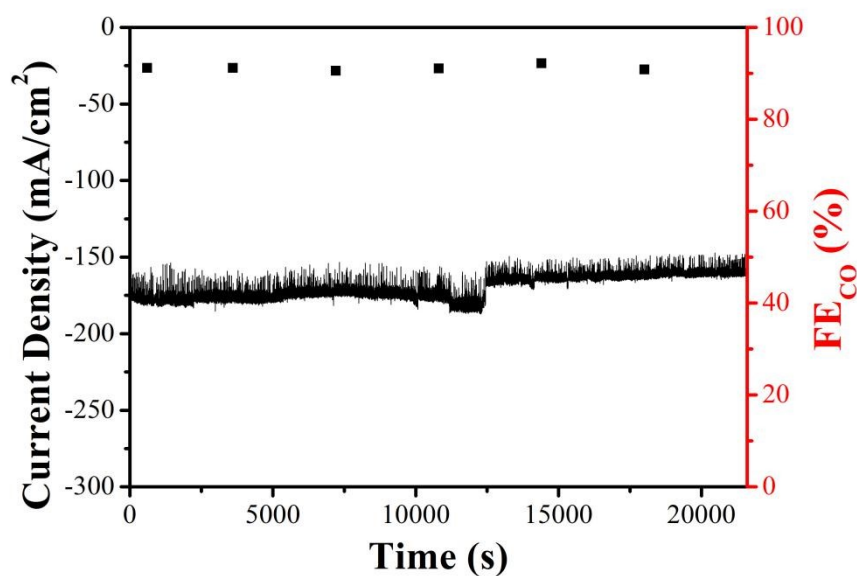

**Figure S19.** Long time stability test of NiPc-Im-COF at -0.6 V vs RHE in GDE with 5 M KOH as electrolyte.



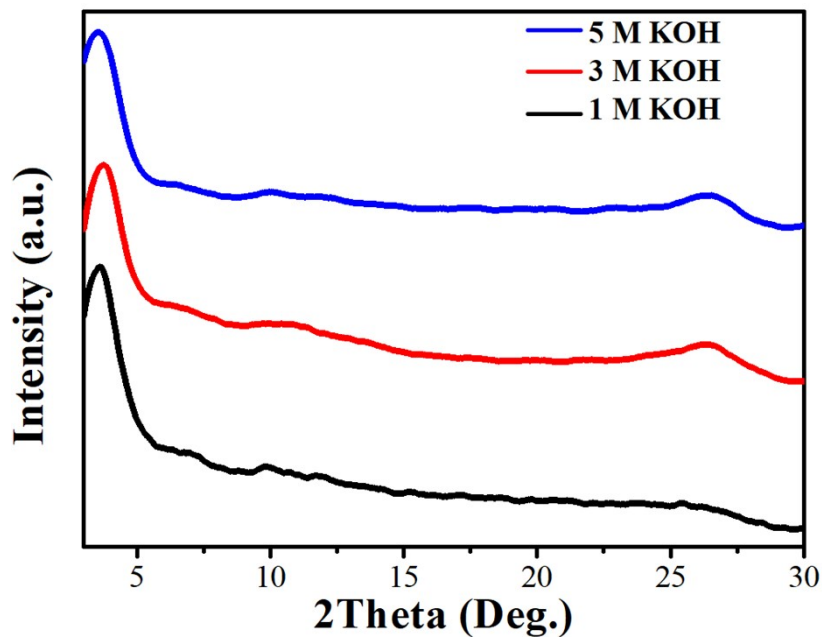

**Figure S20.** PXRD pattern of NiPc-Im-COF after electrocatalytic CO<sub>2</sub>RR in different concentration KOH.

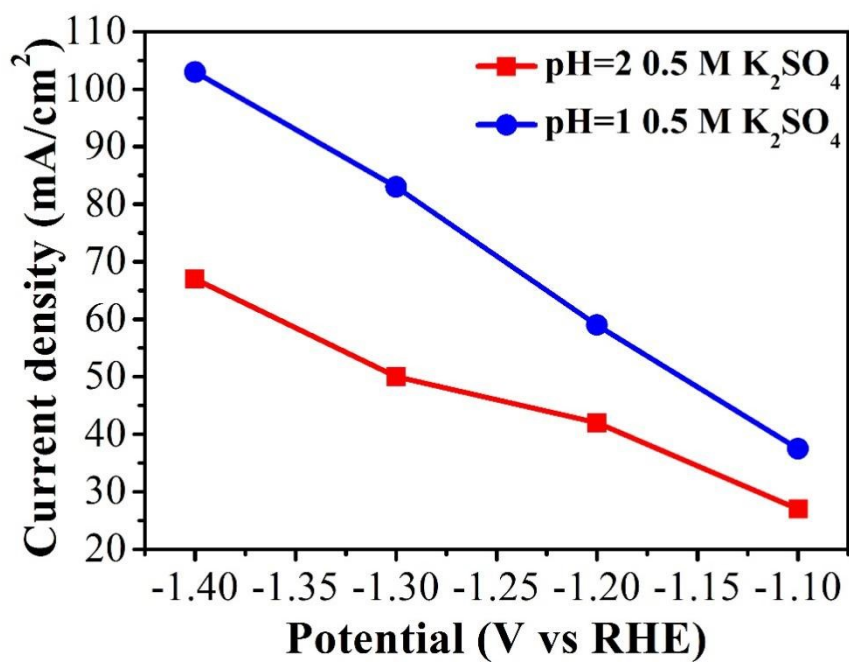

**Figure S21.** The total current density at different potentials in 0.5 M K<sub>2</sub>SO<sub>4</sub> (pH=1 and 2).

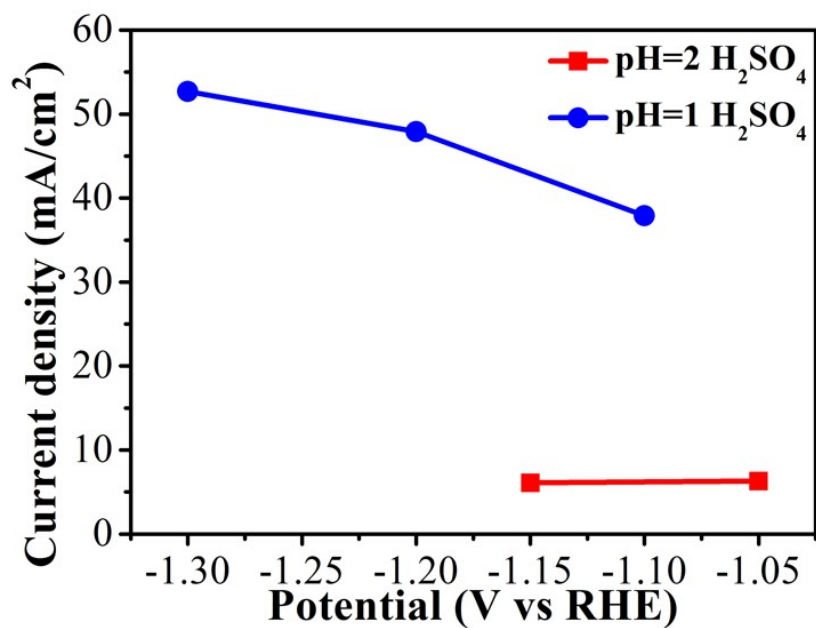

Figure S22. The total current density at different potentials in H<sub>2</sub>SO<sub>4</sub> (pH=1 and 2).

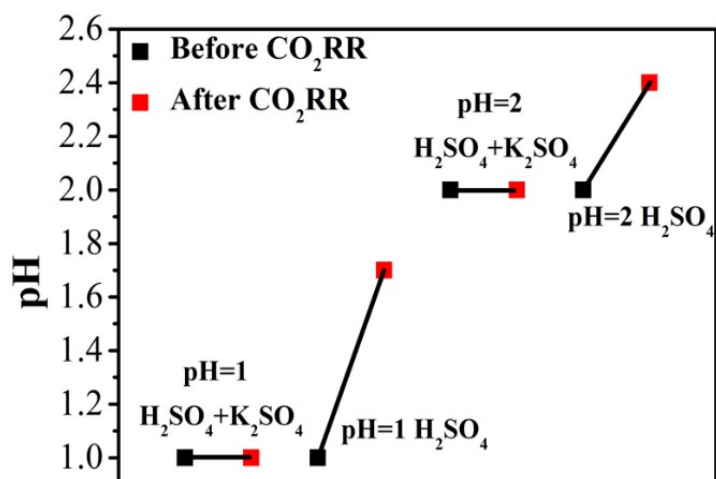

Figure S23. pH values before and after the CO<sub>2</sub>RR of different electrolytes.

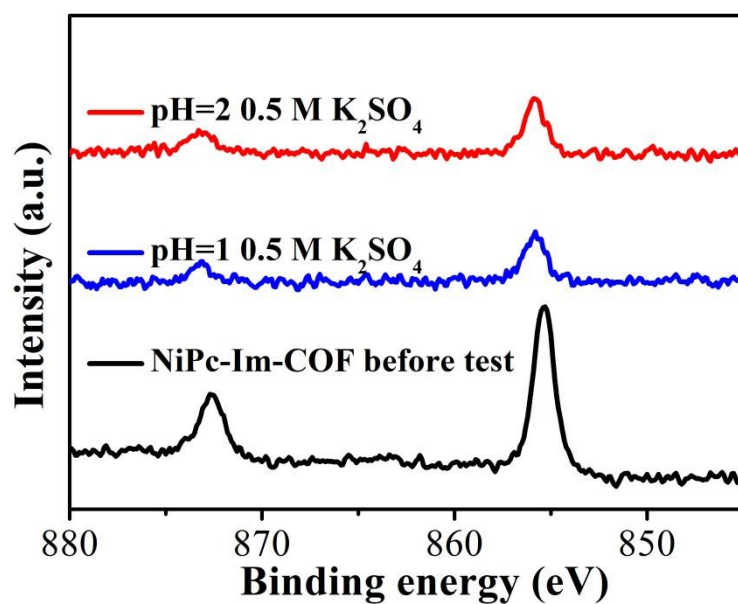

**Figure S24.** High-resolution Ni 2p XPS spectrum of NiPc-Im-COF before and after CO<sub>2</sub>RR testing in GDE with 0.5 M K<sub>2</sub>SO<sub>4</sub> (pH=1 and 2) as electrolyte.

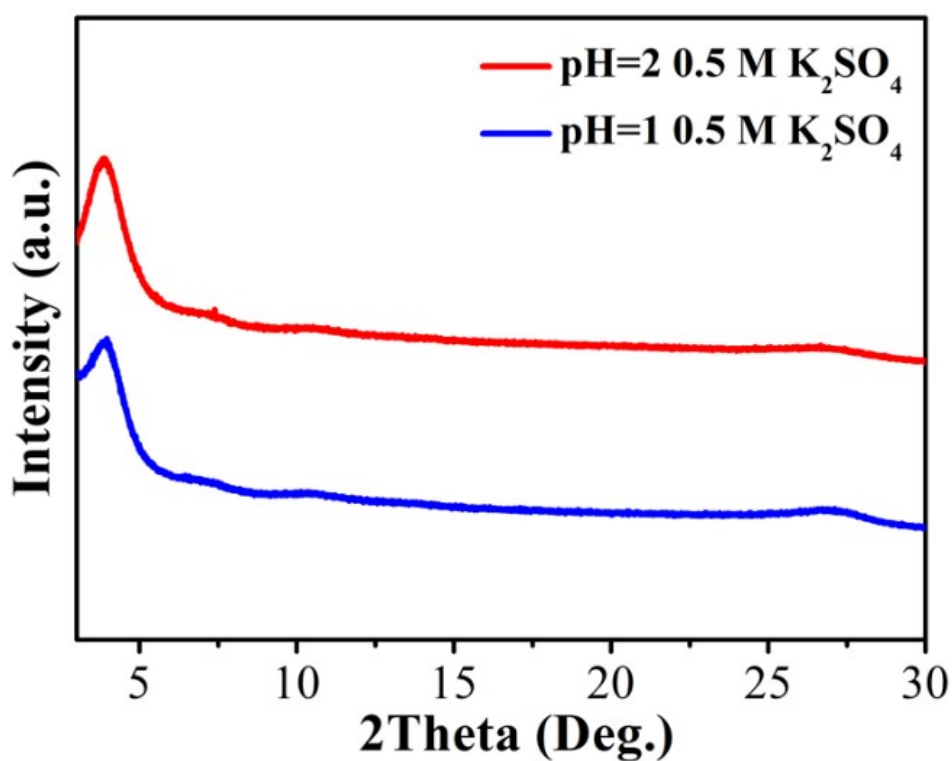

**Figure S25.** PXRD pattern of NiPc-Im-COF after electrocatalytic CO<sub>2</sub>RR in 0.5 M K<sub>2</sub>SO<sub>4</sub> (pH=1 and 2).

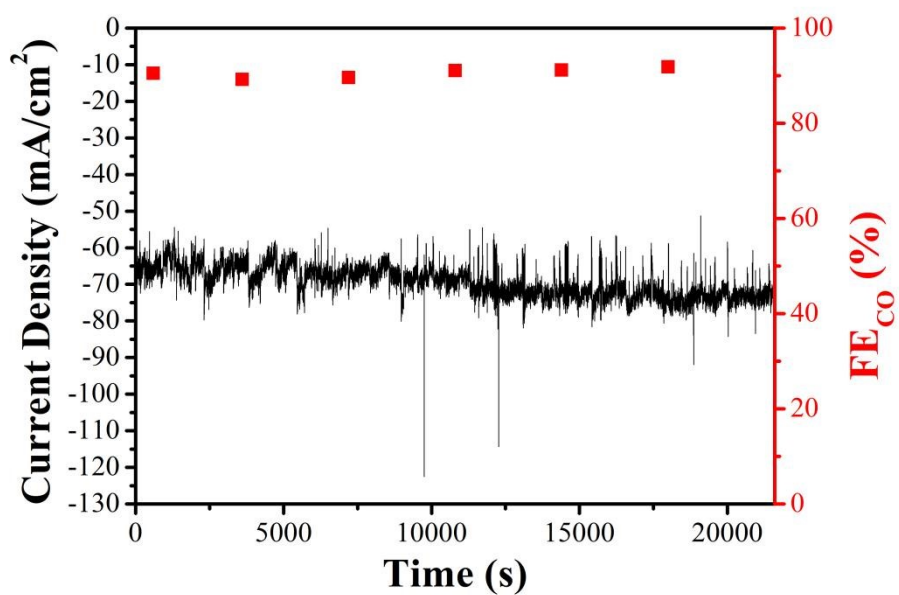

**Figure S26.** Long time stability test of NiPc-Im-COF at -1.3 V vs RHE in GDE with K<sub>2</sub>SO<sub>4</sub> (pH = 1) as electrolyte.

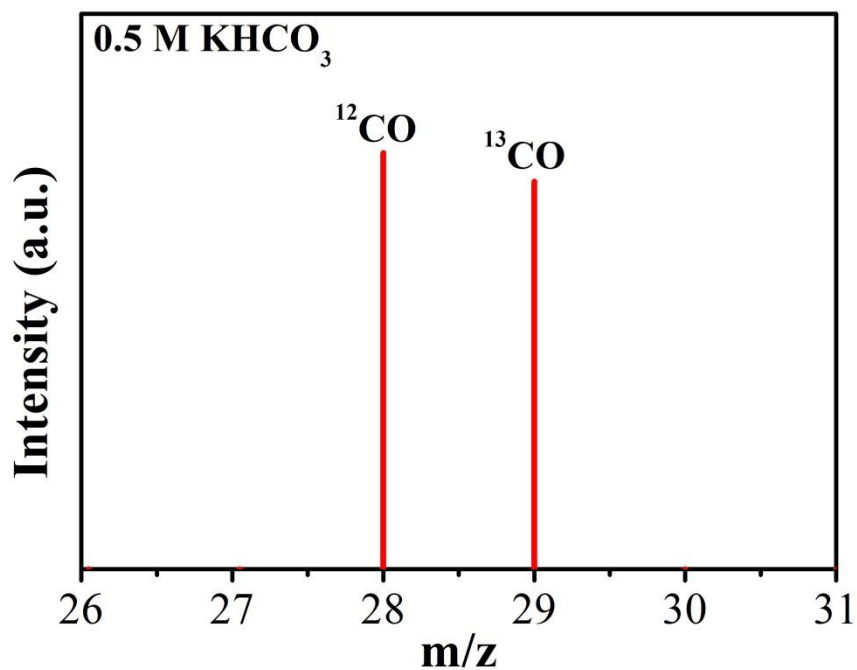

**Figure S27.** Mass spectra of CO in the <sup>13</sup>CO<sub>2</sub>-saturated 0.5 M KHCO<sub>3</sub> for NiPc-Im-COF.

**Table S1.** Result of Ni mass fraction measured by EDS.

| Element | Mass fraction (wt/%) |
|---------|----------------------|
| Ni      | 3.59                 |

**Table S2.** Results of C, N, H, Ni mass fraction measured by ICP.

| Element | Mass fraction (wt/%) |
|---------|----------------------|
| Ni      | 3.75                 |

**Table S3.** Porous characteristics of NiPc-Im-COF.

| Sample | Slangmuir (m <sup>2</sup> /g) | S <sub>BET</sub> (m <sup>2</sup> /g) | Total Pore Volume [cm <sup>3</sup> /g] |
|--------|-------------------------------|--------------------------------------|----------------------------------------|
| Im-COF | 699                           | 360                                  | 0.32                                   |

**Table S4.** Parameters of the Ni K-edge EXAFS fitting results for NiPc-Im-COF.

| Shell | N <sup>a</sup> | $\sigma^2$ (10 <sup>-3</sup> Å <sup>2</sup> ) <sup>b</sup> | $\Delta E_0$ (eV) <sup>c</sup> | R factor <sup>d</sup> | R (Å) <sup>e</sup> |
|-------|----------------|------------------------------------------------------------|--------------------------------|-----------------------|--------------------|
| Ni-N  | 4.2±0.60       | 3.7±2.4                                                    | 5.29                           | 0.053                 | 1.84               |

<sup>a</sup>N: coordination numbers; <sup>b</sup> $\sigma^2$ : Debye-Waller factors; <sup>c</sup> $\Delta E_0$ : the inner potential correction. <sup>d</sup>R factor: goodness of fit; <sup>e</sup>R: distance between absorber and backscatter atoms; Fitting R-range = 1.0 - 2.3; Fitting k-range = 3 - 12.7.

## References

1. M. Wang, M. Ballabio, M. Wang, H.-H. Lin, B. P. Biswal, X. Han, S. Paasch, E. Brunner, P. Liu, M. Chen, M. Bonn, T. Heine, S. Zhou, E. Cánovas, R. Dong and X. Feng, Unveiling Electronic Properties in Metal-Phthalocyanine-Based Pyrazine-Linked Conjugated Two-Dimensional Covalent Organic Frameworks, *J. Am. Chem. Soc.*, 2019, **141**, 16810-16816.
2. G. Kresse and J. Furthmüller, Efficiency of ab-initio total energy calculations for metals and semiconductors using a plane-wave basis set, *Comput. Mater. Sci.*, 1996, **6**, 15-50.
3. G. Kresse, Efficient iterative schemes for ab initio total-energy calculations using a plane-wave basis set, *Phys. Rev. B*, 1996, **54**, 11169-11186.
4. G. Kresse and J. Hafner, Ab initio molecular-dynamics simulation of the liquid-metal-amorphous-semiconductor transition in germanium, *Phys. Rev. B*, 1994, **49**, 14251-14269.
5. G. Kresse and J. Hafner, Ab initio molecular dynamics for liquid metals, *Phys. Rev. B*, 1993, **47**, 558-561.
6. J. P. Perdew, K. Burke and M. Ernzerhof, Generalized Gradient Approximation Made Simple, *Phys. Rev. Lett.*, 1996, **77**, 3865-3868.
7. G. Kresse and D. Joubert, From ultrasoft pseudopotentials to the projector augmented-wave method, *Phys. Rev. B*, 1999, **59**, 1758-1775.
8. P. E. Blöchl, Projector augmented-wave method, *Phys. Rev. B*, 1994, **50**, 17953-17979.
